# Supplementary material for: Thermoresponsive block copolymer micelles with tunable pyrrolidone-based polymer cores: structure/property correlations and application as drug carriers
Source: Royal Society of Chemistry journal article supplement (doi:10.1039/c4tb01494d), 2014-12-02
Supplement: c4tb01494d1.pdf [file c4tb01494d1.pdf]

# Thermoresponsive Block Copolymer Micelles with Tunable Pyrrolidone-based Polymer Cores Structure/Property Correlations and Their Application as Drug Carriers

*Xiao-Li Sun,<sup>a</sup> Pei-Chin Tsai,<sup>b</sup> Rajani Bhat,<sup>a</sup> Edward M. Bonde,<sup>c</sup> Bozena Michniak-Koh<sup>b</sup>,  
Agostino Pietrangelo<sup>\*,a</sup>*

**Supplementary Information**

## Table of Contents

|                                                                                                                                                                                                                                                                                                                                                                                                                                           |    |
|-------------------------------------------------------------------------------------------------------------------------------------------------------------------------------------------------------------------------------------------------------------------------------------------------------------------------------------------------------------------------------------------------------------------------------------------|----|
| Figure S 1. <sup>1</sup> H NMR spectrum of (500 MHz, CDCl <sub>3</sub> , 25 °C) of PNIPAAm-CTA.....                                                                                                                                                                                                                                                                                                                                       | 5  |
| Figure S 2. <sup>1</sup> H NMR spectrum of (500 MHz, CDCl <sub>3</sub> , 25 °C) of PNIPAAm <sub>72</sub> -PBNP <sub>73</sub> .....                                                                                                                                                                                                                                                                                                        | 5  |
| Figure S 3. <sup>1</sup> H NMR spectrum of (500 MHz, CDCl <sub>3</sub> , 25 °C) of PNIPAAm <sub>72</sub> -PBNP <sub>26</sub> .....                                                                                                                                                                                                                                                                                                        | 6  |
| Figure S 4. <sup>1</sup> H NMR spectrum of (500 MHz, CDCl <sub>3</sub> , 25 °C) of PNIPAAm <sub>72</sub> -PMNP <sub>78</sub> .....                                                                                                                                                                                                                                                                                                        | 6  |
| Figure S 5. <sup>1</sup> H NMR spectrum of (500 MHz, CDCl <sub>3</sub> , 25 °C) of PNIPAAm <sub>72</sub> -PMNP <sub>29</sub> .....                                                                                                                                                                                                                                                                                                        | 7  |
| Figure S 6. <sup>1</sup> H NMR spectrum of (500 MHz, CDCl <sub>3</sub> , 25 °C) of PNIPAAm <sub>72</sub> -PNP <sub>79</sub> .....                                                                                                                                                                                                                                                                                                         | 7  |
| Figure S 7. <sup>1</sup> H NMR spectrum of (500 MHz, CDCl <sub>3</sub> , 25 °C) of PNIPAAm <sub>72</sub> -PNP <sub>29</sub> .....                                                                                                                                                                                                                                                                                                         | 8  |
| Figure S 8. GPC trace of PNIPAAm <sub>72</sub> . .....                                                                                                                                                                                                                                                                                                                                                                                    | 8  |
| Figure S 9. GPC trace of PNIPAAm <sub>72</sub> -PBNP <sub>73</sub> (black) and PNIPAAm <sub>72</sub> -PBNP <sub>26</sub> (red).....                                                                                                                                                                                                                                                                                                       | 9  |
| Figure S 10. GPC trace of PNIPAAm <sub>72</sub> -PMNP <sub>78</sub> (black) and PNIPAAm <sub>72</sub> -PBNP <sub>29</sub> (red).....                                                                                                                                                                                                                                                                                                      | 9  |
| Figure S 11. GPC trace of PNIPAAm <sub>72</sub> -PNP <sub>79</sub> (black) and PNIPAAm <sub>72</sub> -PNP <sub>29</sub> (red).....                                                                                                                                                                                                                                                                                                        | 10 |
| Figure S 12. The intensity ratio $I_{337}/I_{334}$ obtained from pyrene excitation spectra of block copolymer solutions vs block copolymer concentration. PNIPAAm <sub>72</sub> -PNP <sub>79</sub> (⊕), PNIPAAm <sub>72</sub> -PMNP <sub>78</sub> (⊗), and PNIPAAm <sub>72</sub> -PBNP <sub>73</sub> (●).....                                                                                                                             | 10 |
| Figure S 13. Hydrodynamic diameter ( $D_h$ ) distribution (Volume (%)) of PNIPAAm <sub>72</sub> -PBNP <sub>26</sub> (●), PNIPAAm <sub>72</sub> -PMNP <sub>29</sub> (⊗), and PNIPAAm <sub>72</sub> -PNP <sub>29</sub> (◆) micelles in water at 25 °C. ....                                                                                                                                                                                 | 11 |
| Figure S 14. Percentage transmittance versus temperature plot of PNIPAAm <sub>72</sub> -PNP <sub>79</sub> (blue circle, dash, forward scan, blue square, dash, reverse scan), PNIPAAm <sub>72</sub> -PMNP <sub>78</sub> (red circle, dash, forward scan, red square dash, reverse scan), and PNIPAAm <sub>72</sub> -PBNP <sub>73</sub> (black circle, solid, forward scan, black square, solid, reverse scan). (0.2 mg/mL, DI Water)..... | 11 |
| Figure S 15. Transmittance versus temperature plot of PNIPAAm <sub>72</sub> -PBNP <sub>26</sub> . Runs 1 (●), 2, (⊗), and 3 (⊕). (0.2 mg/mL, DI Water). ....                                                                                                                                                                                                                                                                              | 12 |
| Figure S 16. Transmittance versus temperature plot of PNIPAAm <sub>72</sub> -PBNP <sub>73</sub> . Runs 1 (●), 2, (⊗), and 3 (⊕). (0.2 mg/mL, DI Water). ....                                                                                                                                                                                                                                                                              | 12 |
| Figure S 17. Transmittance versus temperature plot of PNIPAAm <sub>72</sub> -PMNP <sub>29</sub> . Runs 1 (●), 2, (⊗), and 3 (⊕). (0.2 mg/mL, DI Water).....                                                                                                                                                                                                                                                                               | 13 |
| Figure S 18. Transmittance versus temperature plot of PNIPAAm <sub>72</sub> -PMNP <sub>78</sub> . Runs 1 (●), 2, (⊗), and 3 (⊕). (0.2 mg/mL, DI Water).....                                                                                                                                                                                                                                                                               | 13 |
| Figure S 19. Transmittance versus temperature plot of PNIPAAm <sub>72</sub> -PNP <sub>29</sub> . Runs 1 (●), 2, (⊗), and 3 (⊕). (0.2 mg/mL, DI Water). ....                                                                                                                                                                                                                                                                               | 14 |

|                                                                                                                                                                                            |    |
|--------------------------------------------------------------------------------------------------------------------------------------------------------------------------------------------|----|
| Figure S 20. Transmittance versus temperature plot of PNIPAAm <sub>72</sub> -PNP <sub>73</sub> . Runs 1 (●), 2 (⊕), and 3 (⊕). (0.2 mg/mL, DI Water).....                                  | 14 |
| Figure S 21. Hydrodynamic diameter ( $D_h$ ) distribution (Volume (%)) of PNIPAAm <sub>72</sub> -PBNP <sub>26</sub> micelles at 25 °C (●), 35 °C (■), 40 °C (◆), and 50 °C (⊕). Run 1..... | 15 |
| Figure S 22. Hydrodynamic diameter ( $D_h$ ) distribution (Volume (%)) of PNIPAAm <sub>72</sub> -PBNP <sub>26</sub> micelles at 25 °C (●), 35 °C (■), 40 °C (◆), and 50 °C (⊕). Run 2..... | 15 |
| Figure S 23. Hydrodynamic diameter ( $D_h$ ) distribution (Volume (%)) of PNIPAAm <sub>72</sub> -PBNP <sub>26</sub> micelles at 25 °C (●), 35 °C (■), 40 °C (◆), and 50 °C (⊕). Run 3..... | 16 |
| Figure S 24. Hydrodynamic diameter ( $D_h$ ) distribution (Volume (%)) of PNIPAAm <sub>72</sub> -PMNP <sub>29</sub> micelles at 25 °C (●), 35 °C (■), 40 °C (◆), and 50 °C (⊕). Run 1..... | 16 |
| Figure S 25. Hydrodynamic diameter ( $D_h$ ) distribution (Volume (%)) of PNIPAAm <sub>72</sub> -PMNP <sub>29</sub> micelles at 25 °C (●), 35 °C (■), 40 °C (◆), and 50 °C (⊕). Run 2..... | 17 |
| Figure S 26. Hydrodynamic diameter ( $D_h$ ) distribution (Volume (%)) of PNIPAAm <sub>72</sub> -PMNP <sub>29</sub> micelles at 25 °C (●), 35 °C (■), 40 °C (◆), and 50 °C (⊕). Run 3..... | 17 |
| Figure S 28. Hydrodynamic diameter ( $D_h$ ) distribution (Volume (%)) of PNIPAAm <sub>72</sub> -PNP <sub>29</sub> micelles at 25 °C (●), 35 °C (■), 40 °C (◆), and 50 °C (⊕). Run 2.....  | 18 |
| Figure S 29. Hydrodynamic diameter ( $D_h$ ) distribution (Volume (%)) of PNIPAAm <sub>72</sub> -PNP <sub>29</sub> micelles at 25 °C (●), 35 °C (■), 40 °C (◆), and 50 °C (⊕). Run 3.....  | 19 |
| Figure S 30. Hydrodynamic diameter ( $D_h$ ) distribution (Number (%)) of PNIPAAm <sub>72</sub> -PBNP <sub>73</sub> micelles at 25 °C (●), 35 °C (■), 40 °C (◆), and 50 °C (⊕).....        | 19 |
| Figure S 31. Hydrodynamic diameter ( $D_h$ ) distribution (Volume (%)) of PNIPAAm <sub>72</sub> -PBNP <sub>73</sub> micelles at 25 °C (●), 35 °C (■), 40 °C (◆), and 50 °C (⊕). Run 1..... | 20 |
| Figure S 32. Hydrodynamic diameter ( $D_h$ ) distribution (Volume (%)) of PNIPAAm <sub>72</sub> -PBNP <sub>73</sub> micelles at 25 °C (●), 35 °C (■), 40 °C (◆), and 50 °C (⊕). Run 2..... | 20 |
| Figure S 33. Hydrodynamic diameter ( $D_h$ ) distribution (Volume (%)) of PNIPAAm <sub>72</sub> -PBNP <sub>73</sub> micelles at 25 °C (●), 35 °C (■), 40 °C (◆), and 50 °C (⊕). Run 3..... | 21 |
| Figure S 34. Hydrodynamic diameter ( $D_h$ ) distribution (Number (%)) of PNIPAAm <sub>72</sub> -PMNP <sub>78</sub> micelles at 25 °C (●), 35 °C (■), 40 °C (◆), and 50 °C (⊕).....        | 21 |
| Figure S 35. Hydrodynamic diameter ( $D_h$ ) distribution (Volume (%)) of PNIPAAm <sub>72</sub> -PMNP <sub>78</sub> micelles at 25 °C (●), 35 °C (■), 40 °C (◆), and 50 °C (⊕). Run 1..... | 22 |
| Figure S 36. Hydrodynamic diameter ( $D_h$ ) distribution (Volume (%)) of PNIPAAm <sub>72</sub> -PMNP <sub>78</sub> micelles at 25 °C (●), 35 °C (■), 40 °C (◆), and 50 °C (⊕). Run 2..... | 22 |

|                                                                                                                                                                                                                                                                                                                       |    |
|-----------------------------------------------------------------------------------------------------------------------------------------------------------------------------------------------------------------------------------------------------------------------------------------------------------------------|----|
| Figure S 37. Hydrodynamic diameter ( $D_h$ ) distribution (Volume (%)) of PNIPAAm <sub>72</sub> -PMNP <sub>78</sub> micelles at 25 °C (●), 35 °C (■), 40 °C (◆), and 50 °C (⊕). Run 3.....                                                                                                                            | 23 |
| Figure S 38. Hydrodynamic diameter ( $D_h$ ) distribution (Number (%)) of PNIPAAm <sub>72</sub> -PNP <sub>79</sub> micelles at 25 °C (●), 35 °C (■), 40 °C (◆), and 50 °C (⊕).....                                                                                                                                    | 23 |
| Figure S 39. Hydrodynamic diameter ( $D_h$ ) distribution (Volume (%)) of PNIPAAm <sub>72</sub> -PNP <sub>79</sub> micelles at 25 °C (●), 35 °C (■), 40 °C (◆), and 50 °C (⊕). Run 1.....                                                                                                                             | 24 |
| Figure S 40. Hydrodynamic diameter ( $D_h$ ) distribution (Volume (%)) of PNIPAAm <sub>72</sub> -PNP <sub>79</sub> micelles at 25 °C (●), 35 °C (■), 40 °C (◆), and 50 °C (⊕). Run 2.....                                                                                                                             | 24 |
| Figure S 41. Hydrodynamic diameter ( $D_h$ ) distribution (Volume (%)) of PNIPAAm <sub>72</sub> -PNP <sub>79</sub> micelles at 25 °C (●), 35 °C (■), 40 °C (◆), and 50 °C (⊕). Run 3.....                                                                                                                             | 25 |
| Figure S 42. DOX release from a) PNIPAAm <sub>72</sub> -PNP <sub>79</sub> at 37°C (⊕) and 20°C (⊗), PNIPAAm <sub>72</sub> -PMNP <sub>78</sub> at 37°C (◆) and 20°C (⊠), and PNIPAAm <sub>72</sub> -PBNP <sub>73</sub> 37°C (●) and 20°C (⊙). Data points are plotted as a mean with standard deviation (n = 3). ..... | 25 |
| Table S1. LCST (°C) of block copolymers in deionized water.....                                                                                                                                                                                                                                                       | 26 |
| Table S2. LCST (°C) of block copolymers in PBS solution. ....                                                                                                                                                                                                                                                         | 26 |
| Table S3. $D_h$ of micelles (Volume (%)) with PDI in parentheses.....                                                                                                                                                                                                                                                 | 26 |
| Table S4. $D_h$ of drug-loaded micelles (Volume (%)) with PDI in parentheses. ....                                                                                                                                                                                                                                    | 26 |

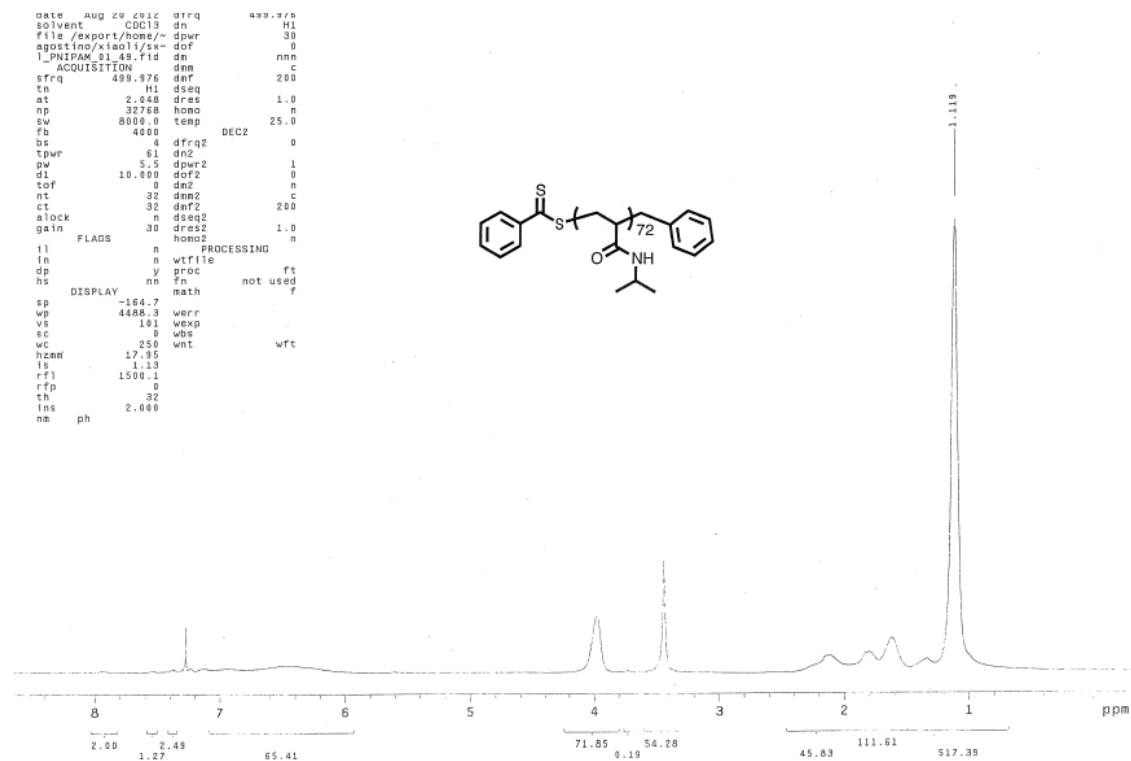

Figure S 1. <sup>1</sup>H NMR spectrum of (500 MHz, CDCl<sub>3</sub>, 25 °C) of PNIPAAm-CTA.

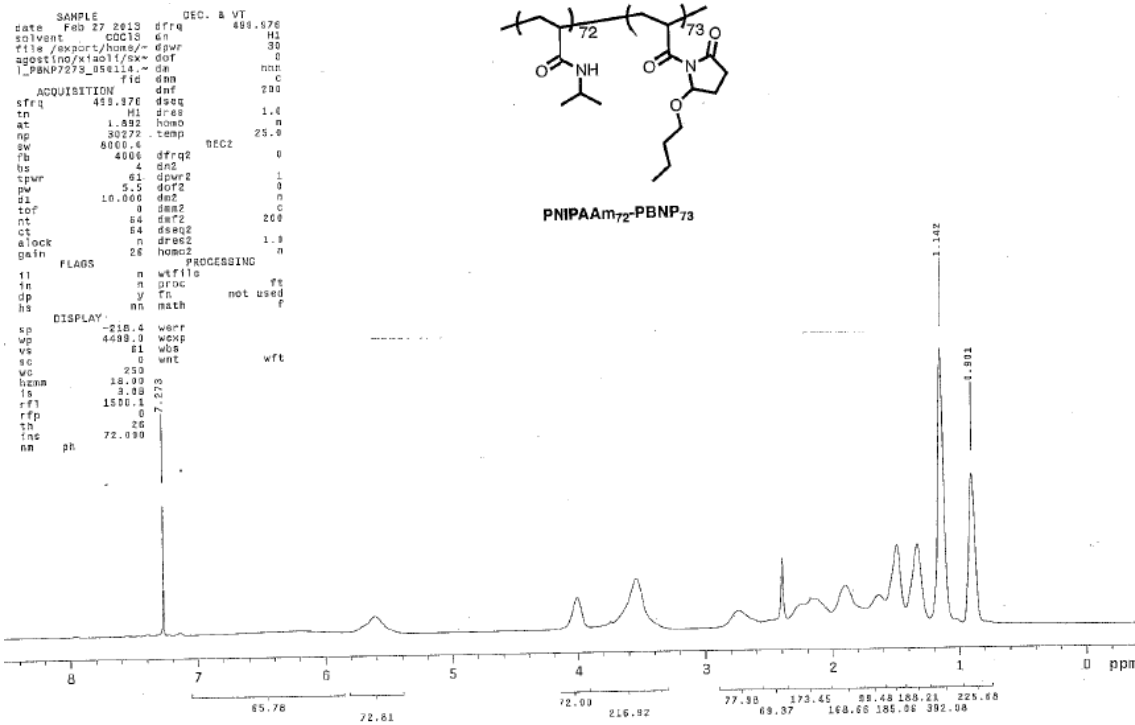

Figure S 2. <sup>1</sup>H NMR spectrum of (500 MHz, CDCl<sub>3</sub>, 25 °C) of PNIPAAm<sub>72</sub>-PBNP<sub>73</sub>.

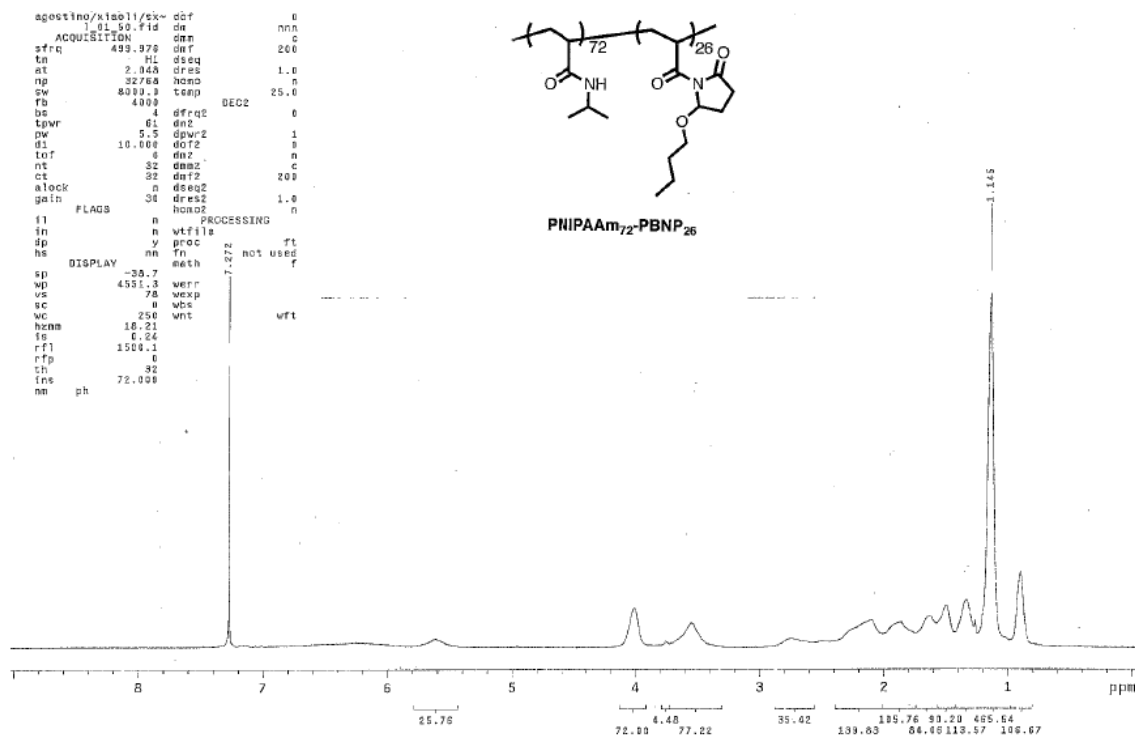

Figure S 3. <sup>1</sup>H NMR spectrum of (500 MHz, CDCl<sub>3</sub>, 25 °C) of PNIPAAm<sub>72</sub>-PBNP<sub>26</sub>.

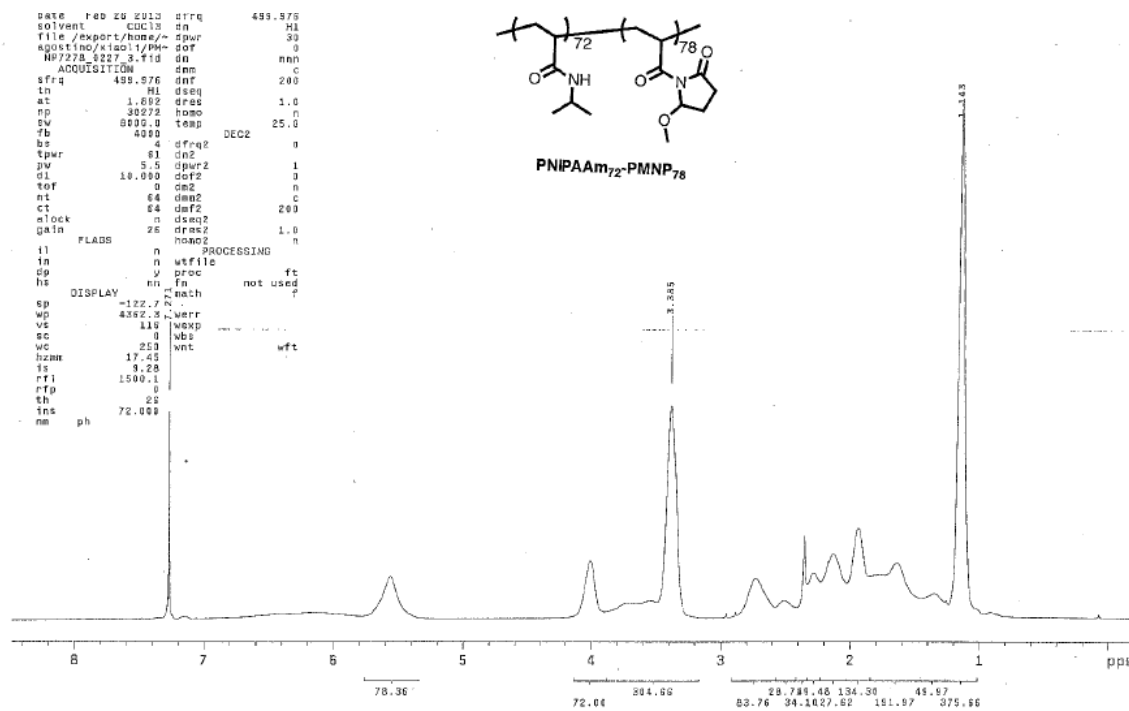

Figure S 4. <sup>1</sup>H NMR spectrum of (500 MHz, CDCl<sub>3</sub>, 25 °C) of PNIPAAm<sub>72</sub>-PMNP<sub>78</sub>.

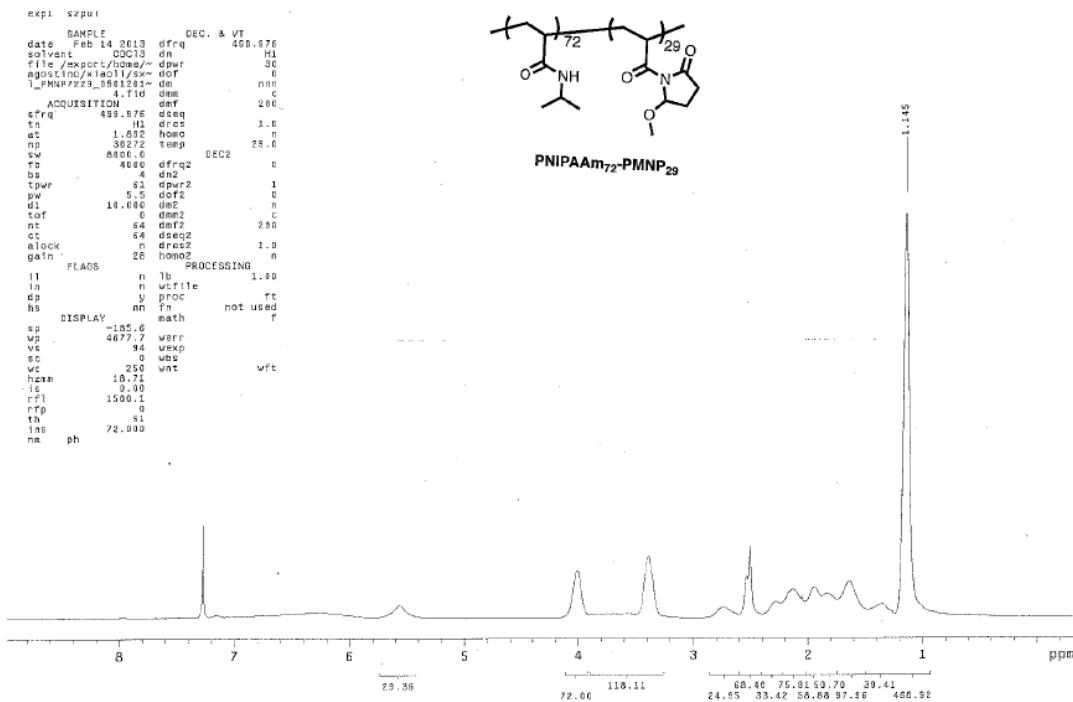

Figure S 5. <sup>1</sup>H NMR spectrum of (500 MHz, CDCl<sub>3</sub>, 25 °C) of PNIPAAm<sub>72</sub>-PMNP<sub>29</sub>.

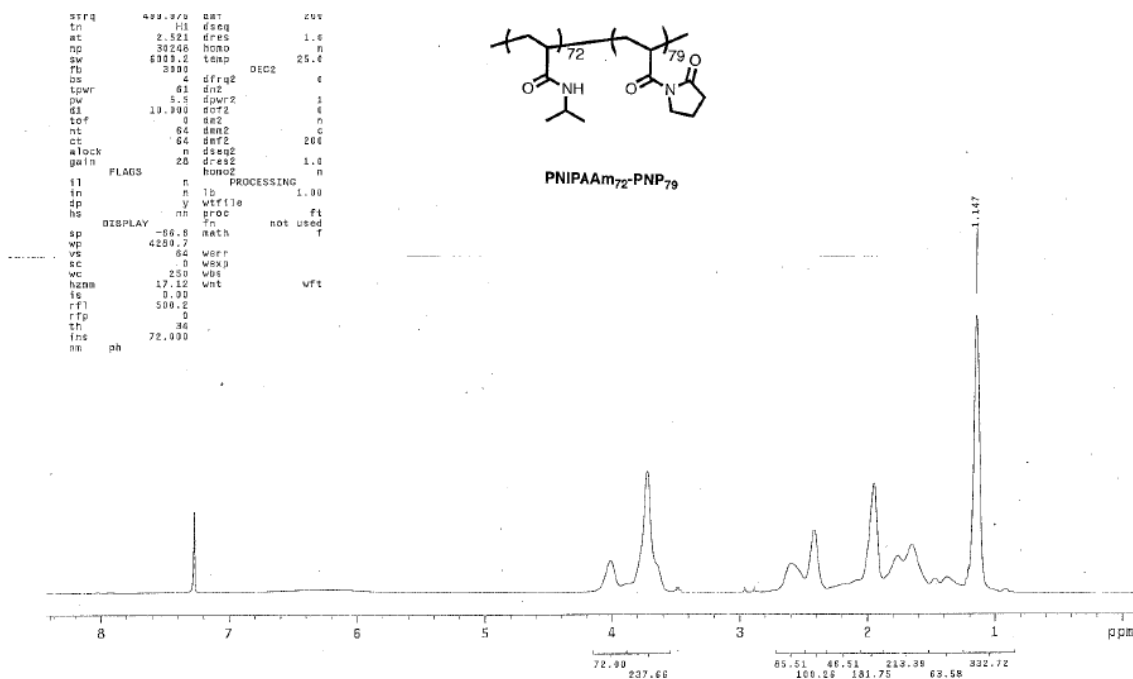

Figure S 6. <sup>1</sup>H NMR spectrum of (500 MHz, CDCl<sub>3</sub>, 25 °C) of PNIPAAm<sub>72</sub>-PNP<sub>79</sub>.

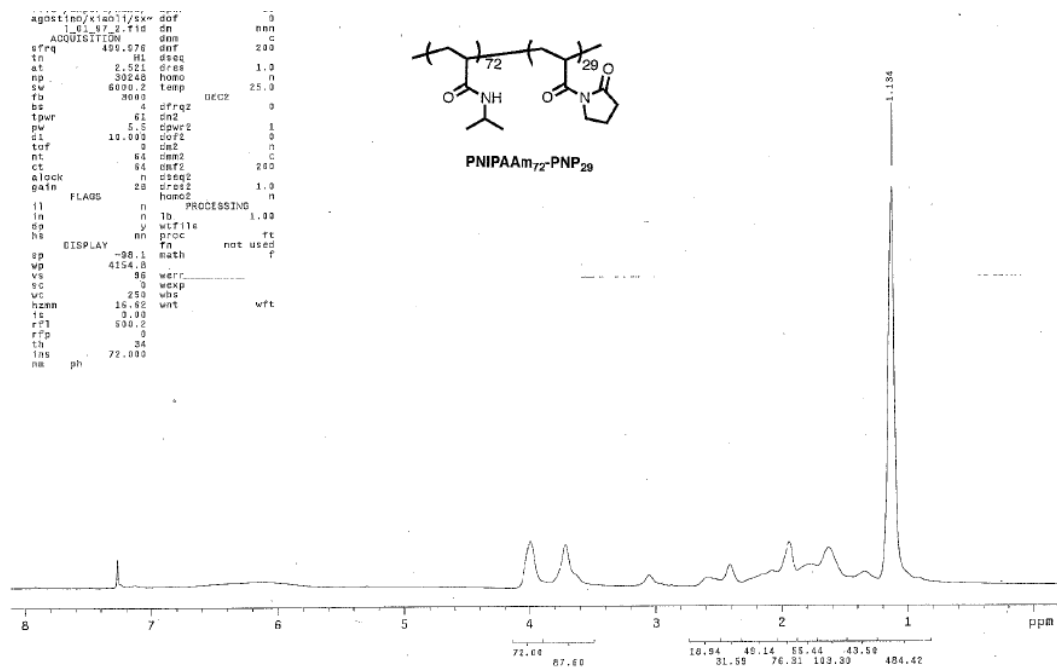

Figure S 7. <sup>1</sup>H NMR spectrum of (500 MHz, CDCl<sub>3</sub>, 25 °C) of PNIPAAm<sub>72</sub>-PNP<sub>29</sub>.

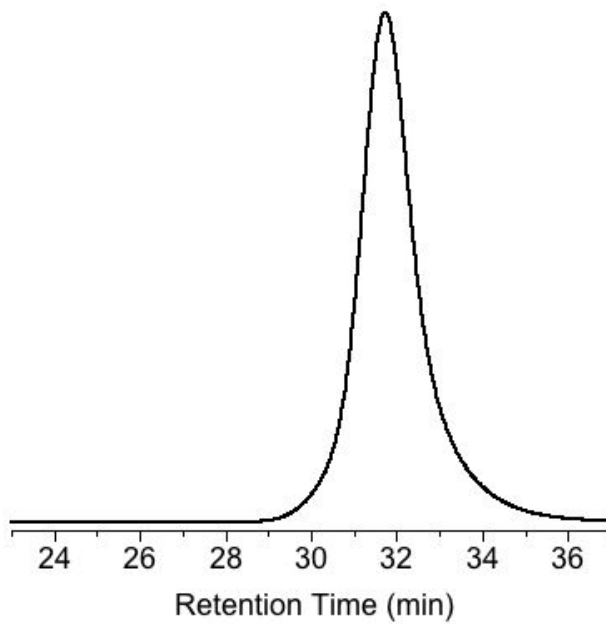

Figure S 8. GPC trace of PNIPAAm<sub>72</sub>.



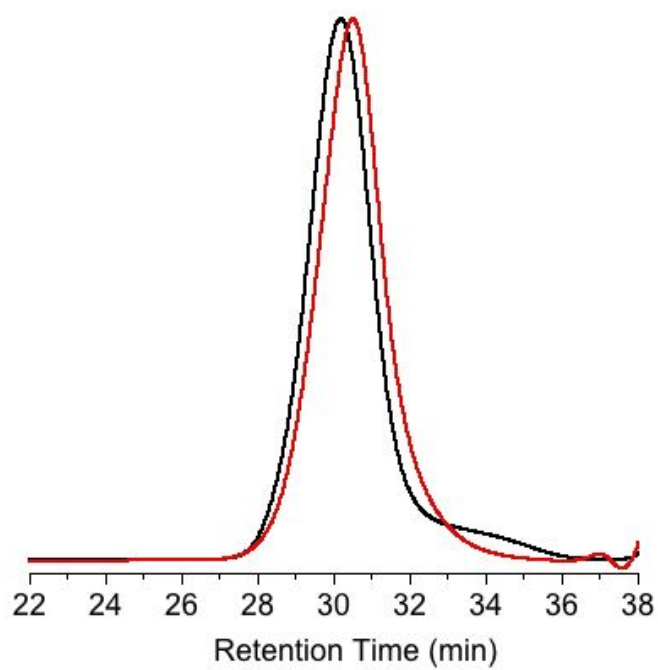

Figure S 9. GPC trace of PNIPAAm<sub>72</sub>-PBNP<sub>73</sub> (black) and PNIPAAm<sub>72</sub>-PBNP<sub>26</sub> (red).

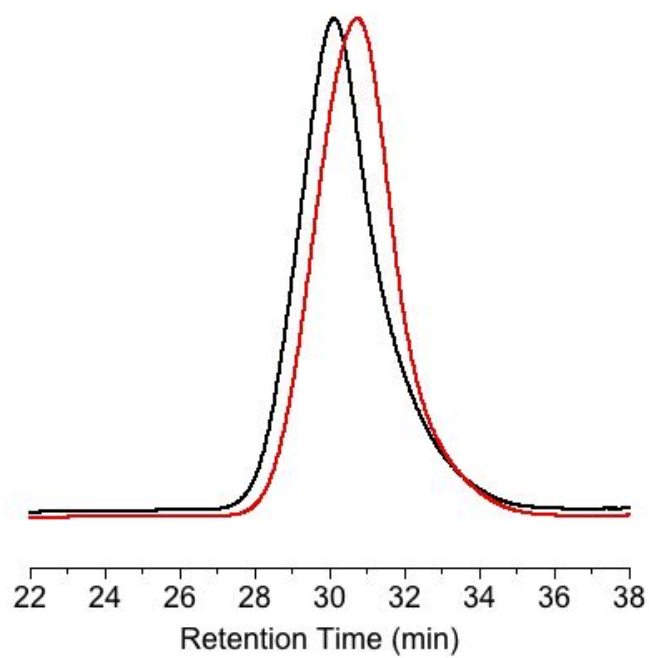

Figure S 10. GPC trace of PNIPAAm<sub>72</sub>-PMNP<sub>78</sub> (black) and PNIPAAm<sub>72</sub>-PBNP<sub>29</sub> (red).

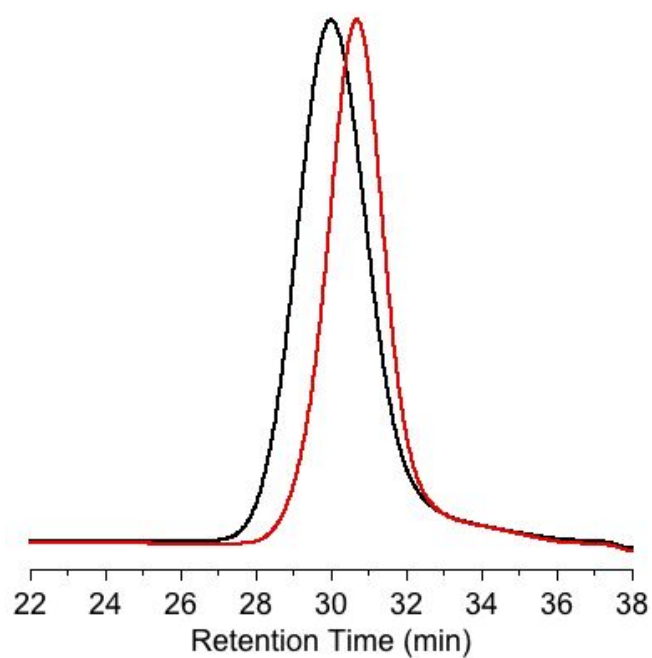

Figure S 11. GPC trace of PNIPAAm<sub>72</sub>-PNP<sub>79</sub> (black) and PNIPAAm<sub>72</sub>-PNP<sub>29</sub> (red).

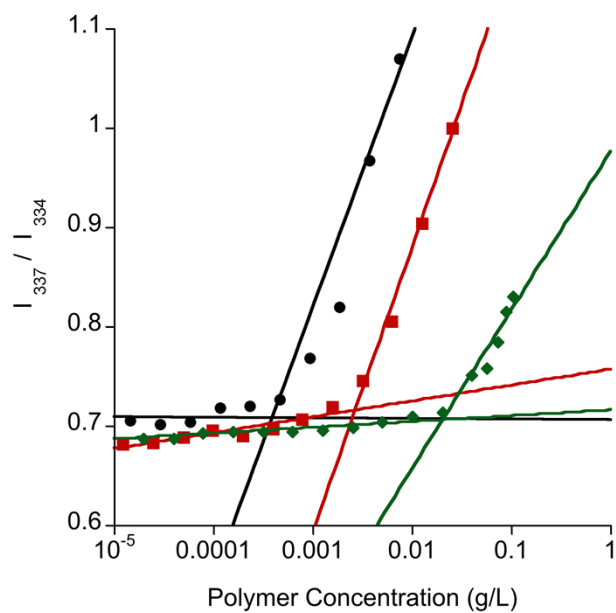

Figure S 12. The intensity ratio  $I_{337}/I_{334}$  obtained from pyrene excitation spectra of block copolymer solutions vs block copolymer concentration. PNIPAAm<sub>72</sub>-PNP<sub>79</sub> (◊), PNIPAAm<sub>72</sub>-PMNP<sub>78</sub> (◻), and PNIPAAm<sub>72</sub>-PBNP<sub>73</sub> (●).

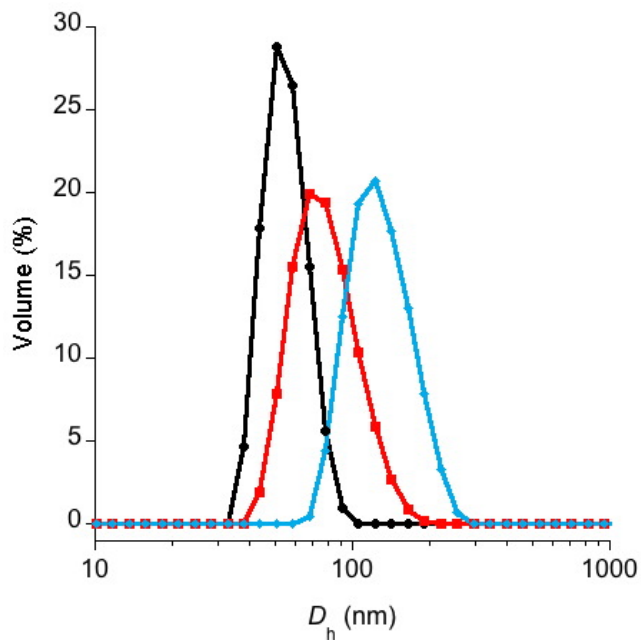

Figure S 13. Hydrodynamic diameter ( $D_h$ ) distribution (Volume (%)) of PNIPAAm<sub>72</sub>-PBNP<sub>26</sub> (●), PNIPAAm<sub>72</sub>-PMNP<sub>29</sub> (○), and PNIPAAm<sub>72</sub>-PNP<sub>29</sub> (◆) micelles in water at 25 °C.

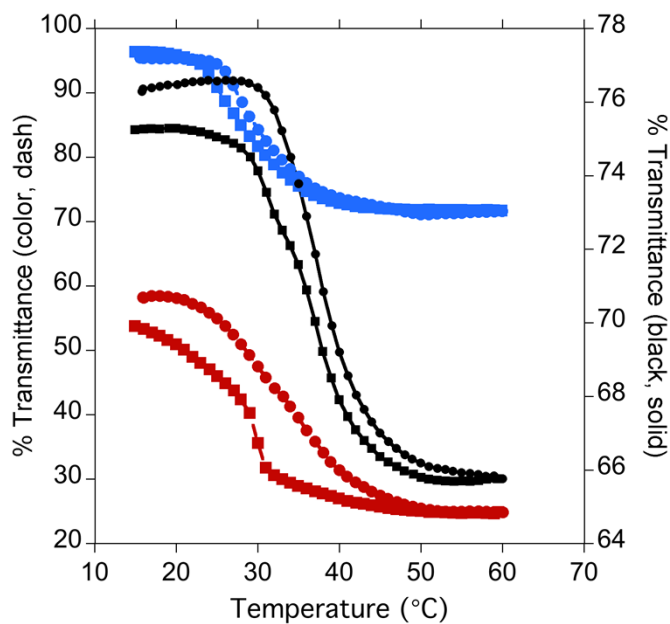

Figure S 14. Percentage transmittance versus temperature plot of PNIPAAm<sub>72</sub>-PNP<sub>79</sub> (blue circle, dash, forward scan, blue square, dash, reverse scan), PNIPAAm<sub>72</sub>-PMNP<sub>78</sub> (red circle, dash, forward scan, red square dash, reverse scan), and PNIPAAm<sub>72</sub>-PBNP<sub>73</sub> (black circle, solid, forward scan, black square, solid, reverse scan). (0.2 mg/mL, DI Water).

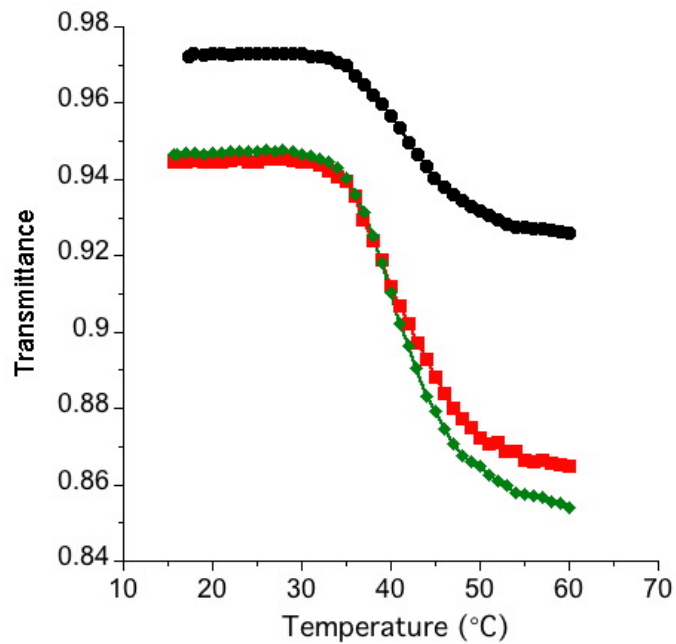

Figure S 15. Transmittance versus temperature plot of PNIPAAm<sub>72</sub>-PBPN<sub>26</sub>. Runs 1 (●), 2, (◻), and 3 (◊). (0.2 mg/mL, DI Water).

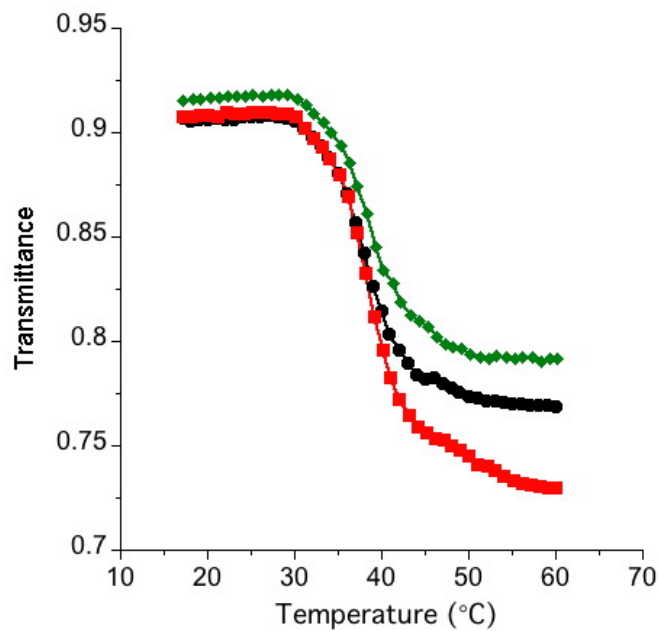

Figure S 16. Transmittance versus temperature plot of PNIPAAm<sub>72</sub>-PBPN<sub>73</sub>. Runs 1 (●), 2, (◻), and 3 (◊). (0.2 mg/mL, DI Water).

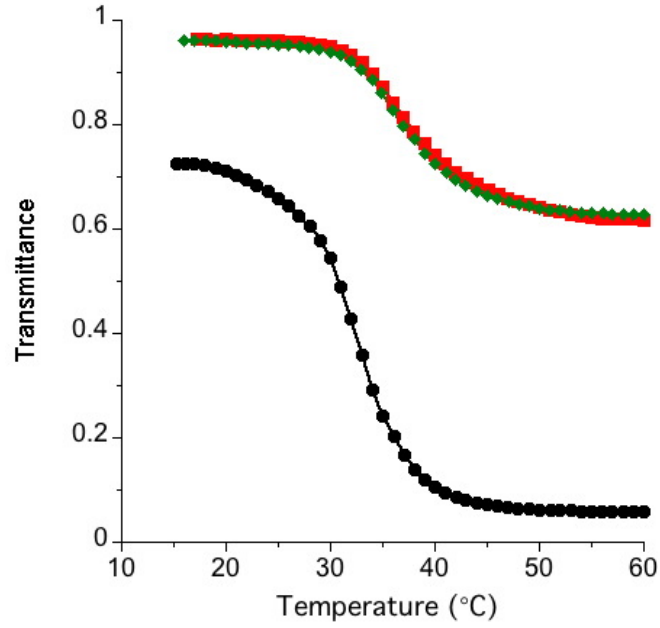

Figure S 17. Transmittance versus temperature plot of PNIPAAm<sub>72</sub>-PMNP<sub>29</sub>. Runs 1 (●), 2, (◻), and 3 (◊). (0.2 mg/mL, DI Water).

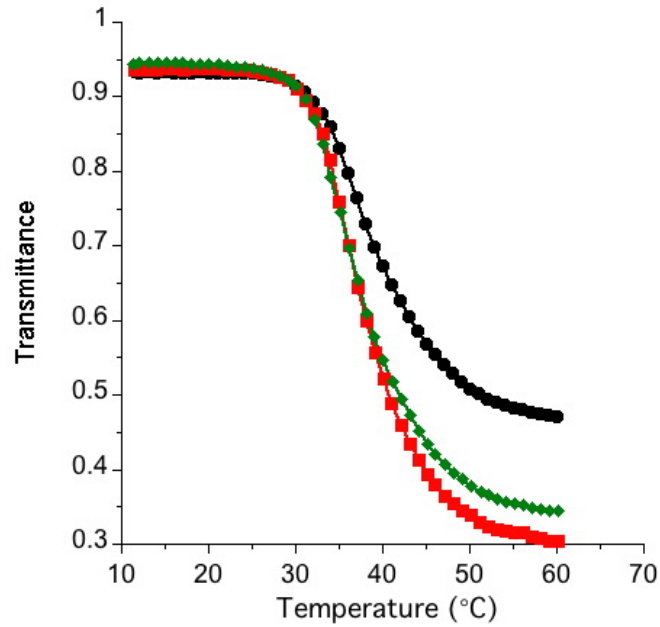

Figure S 18. Transmittance versus temperature plot of PNIPAAm<sub>72</sub>-PMNP<sub>78</sub>. Runs 1 (●), 2, (◻), and 3 (◊). (0.2 mg/mL, DI Water).

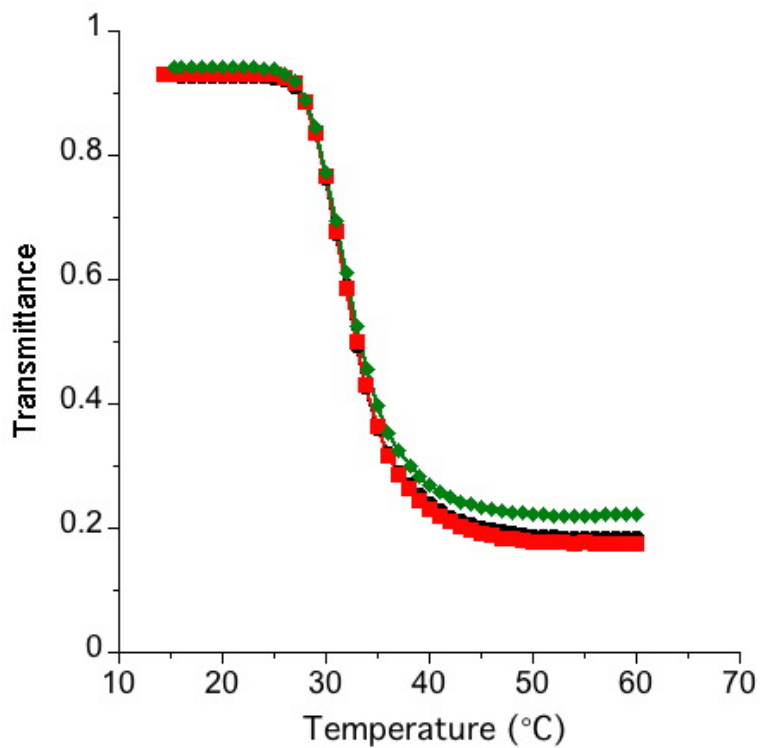

Figure S 19. Transmittance versus temperature plot of PNIPAAm<sub>72</sub>-PNP<sub>29</sub>. Runs 1 (●), 2, (⊙), and 3 (⊕). (0.2 mg/mL, DI Water).

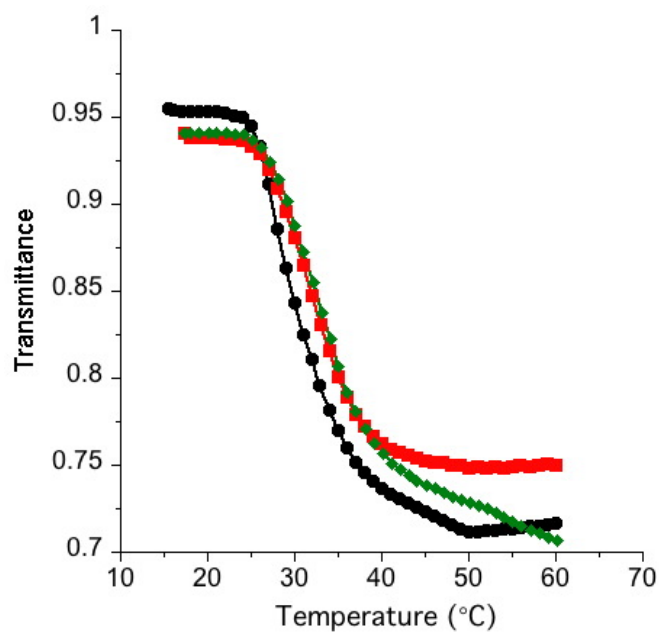

Figure S 20. Transmittance versus temperature plot of PNIPAAm<sub>72</sub>-PNP<sub>73</sub>. Runs 1 (●), 2, (⊙), and 3 (⊕). (0.2 mg/mL, DI Water).

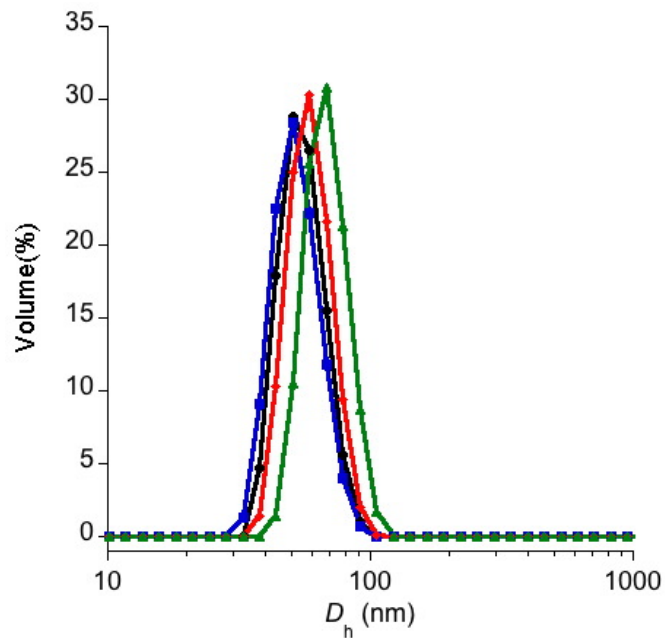

Figure S 21. Hydrodynamic diameter ( $D_h$ ) distribution (Volume (%)) of PNIPAAm<sub>72</sub>-PBNP<sub>26</sub> micelles at 25 °C (●), 35 °C (■), 40 °C (◆), and 50 °C (◻). Run 1.

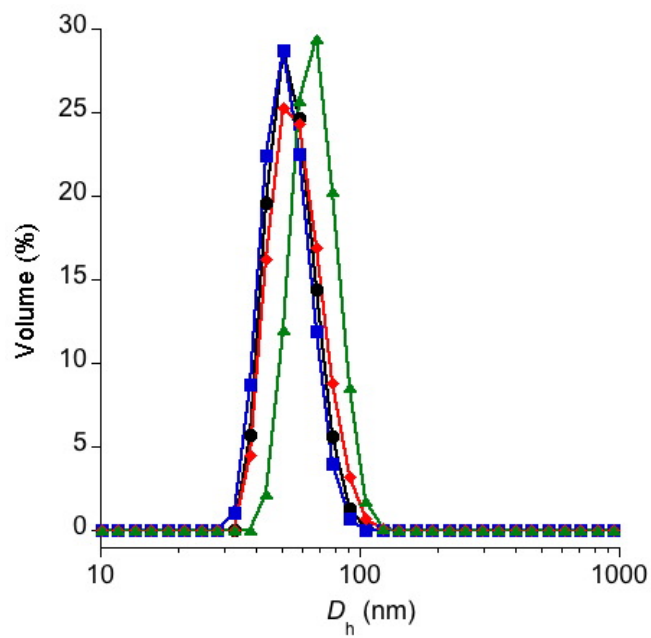

Figure S 22. Hydrodynamic diameter ( $D_h$ ) distribution (Volume (%)) of PNIPAAm<sub>72</sub>-PBNP<sub>26</sub> micelles at 25 °C (●), 35 °C (■), 40 °C (◆), and 50 °C (◻). Run 2.

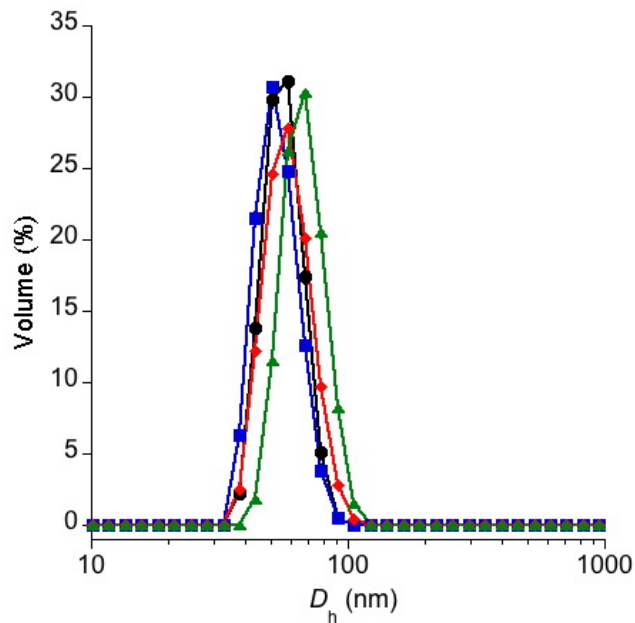

Figure S 23. Hydrodynamic diameter ( $D_h$ ) distribution (Volume (%)) of PNIPAAm<sub>72</sub>-PBNP<sub>26</sub> micelles at 25 °C (●), 35 °C (■), 40 °C (◆), and 50 °C (⊙). Run 3.

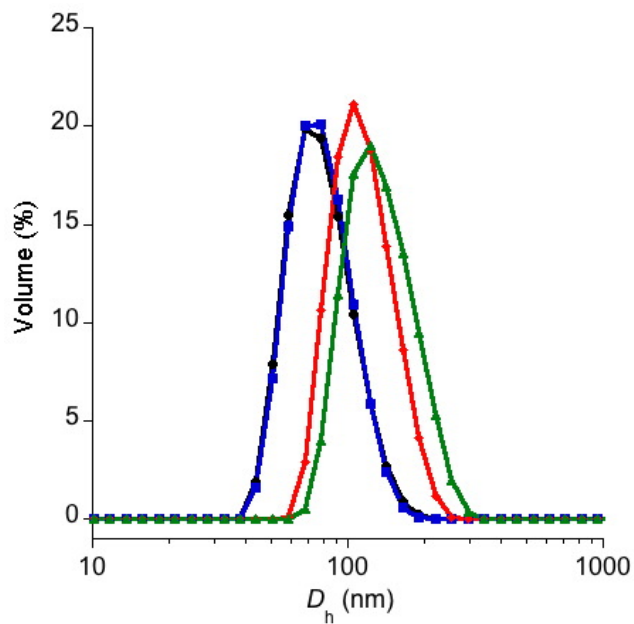

Figure S 24. Hydrodynamic diameter ( $D_h$ ) distribution (Volume (%)) of PNIPAAm<sub>72</sub>-PMNP<sub>29</sub> micelles at 25 °C (●), 35 °C (■), 40 °C (◆), and 50 °C (⊙). Run 1.



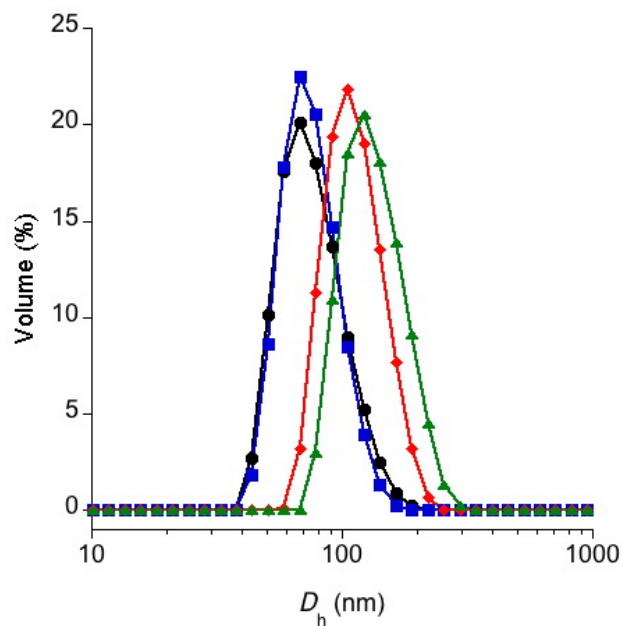

Figure S 25. Hydrodynamic diameter ( $D_h$ ) distribution (Volume (%)) of PNIPAAm<sub>72</sub>-PMNP<sub>29</sub> micelles at 25 °C (●), 35 °C (■), 40 °C (◆), and 50 °C (⊖). Run 2.

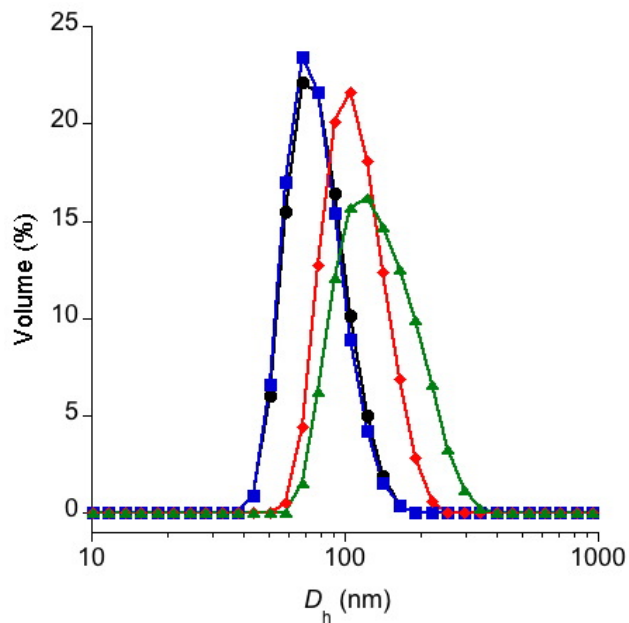

Figure S 26. Hydrodynamic diameter ( $D_h$ ) distribution (Volume (%)) of PNIPAAm<sub>72</sub>-PMNP<sub>29</sub> micelles at 25 °C (●), 35 °C (■), 40 °C (◆), and 50 °C (⊖). Run 3.

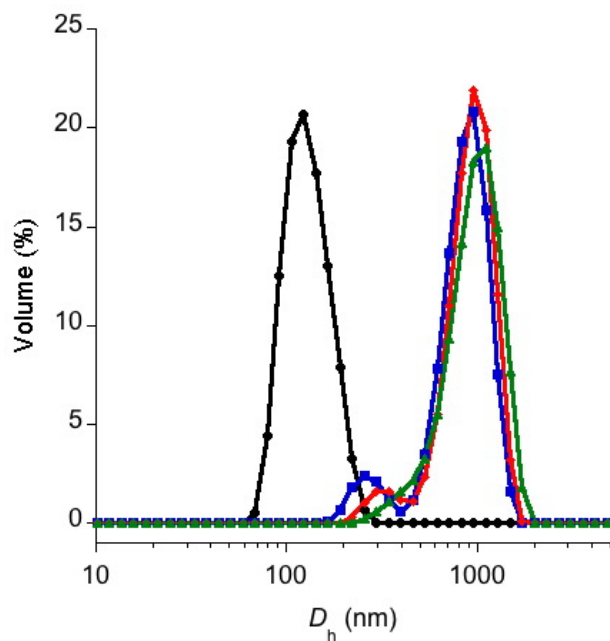

Figure S 27. Hydrodynamic diameter ( $D_h$ ) distribution (Volume %) of PNIPAAm<sub>72</sub>-PNP<sub>29</sub> micelles at 25 °C (●), 35 °C (■), 40 °C (◆), and 50 °C (⊙). Run 1.

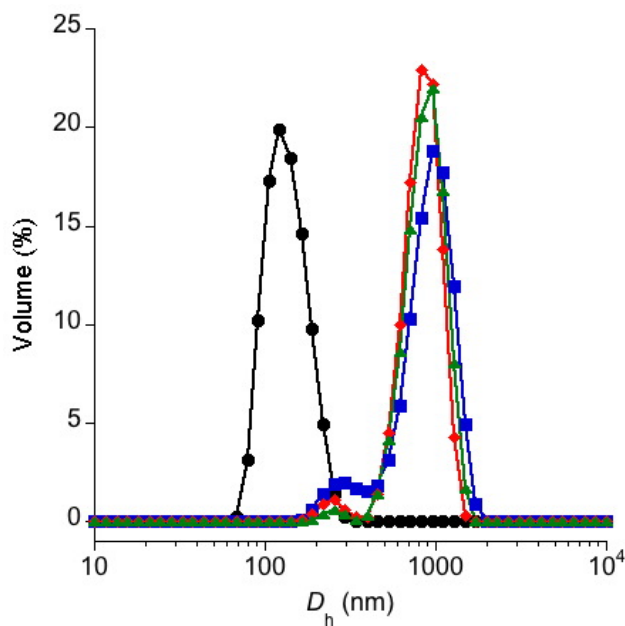

Figure S 28. Hydrodynamic diameter ( $D_h$ ) distribution (Volume %) of PNIPAAm<sub>72</sub>-PNP<sub>29</sub> micelles at 25 °C (●), 35 °C (■), 40 °C (◆), and 50 °C (⊙). Run 2.

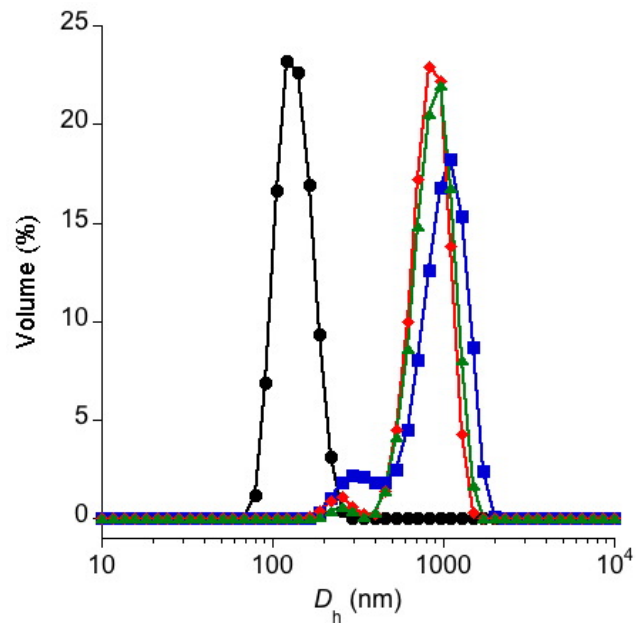

Figure S 29. Hydrodynamic diameter ( $D_h$ ) distribution (Volume (%)) of PNIPAAm<sub>72</sub>-PNP<sub>29</sub> micelles at 25 °C (●), 35 °C (■), 40 °C (◆), and 50 °C (⊙). Run 3.

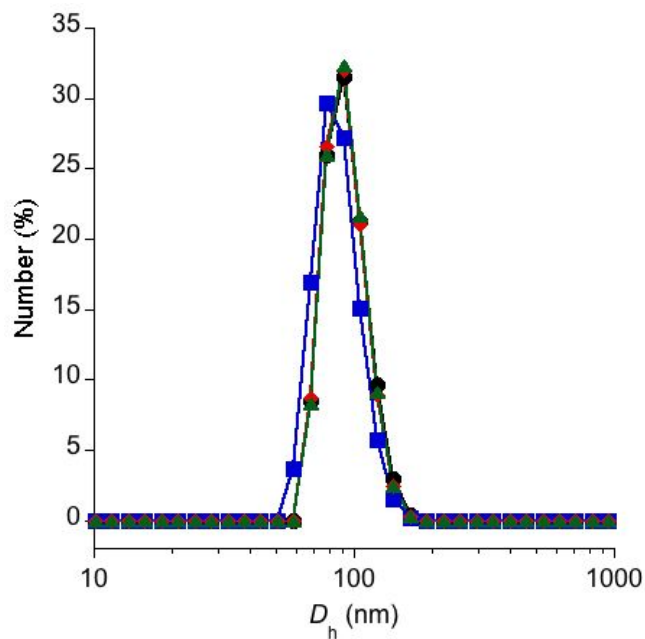

Figure S 30. Hydrodynamic diameter ( $D_h$ ) distribution (Number (%)) of PNIPAAm<sub>72</sub>-PBNP<sub>73</sub> micelles at 25 °C (●), 35 °C (■), 40 °C (◆), and 50 °C (⊙).

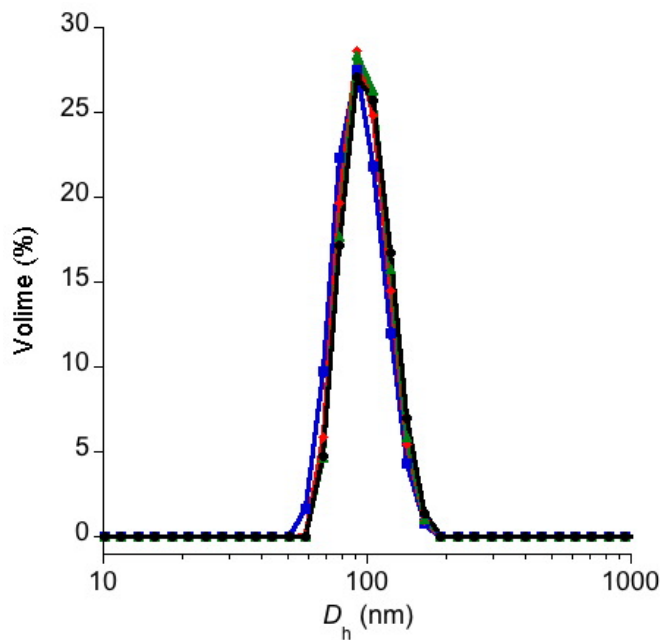

Figure S 31. Hydrodynamic diameter ( $D_h$ ) distribution (Volume (%)) of PNIPAAm<sub>72</sub>-PBNP<sub>73</sub> micelles at 25 °C (●), 35 °C (■), 40 °C (◆), and 50 °C (⊙). Run 1.

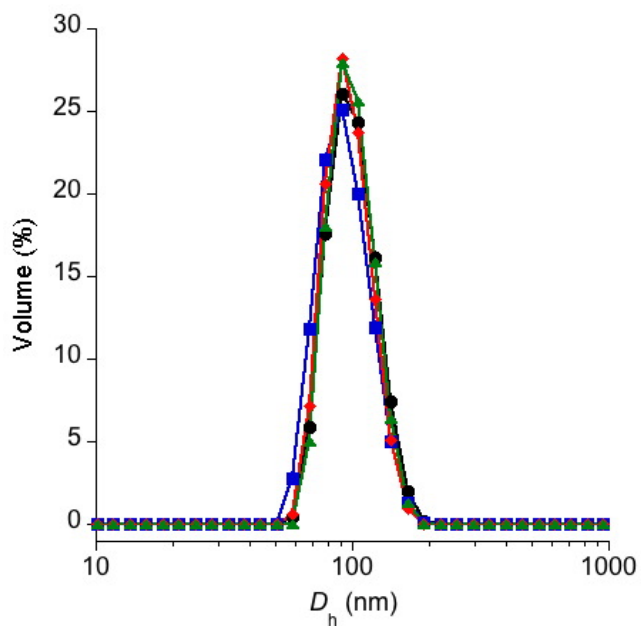

Figure S 32. Hydrodynamic diameter ( $D_h$ ) distribution (Volume (%)) of PNIPAAm<sub>72</sub>-PBNP<sub>73</sub> micelles at 25 °C (●), 35 °C (■), 40 °C (◆), and 50 °C (⊙). Run 2.

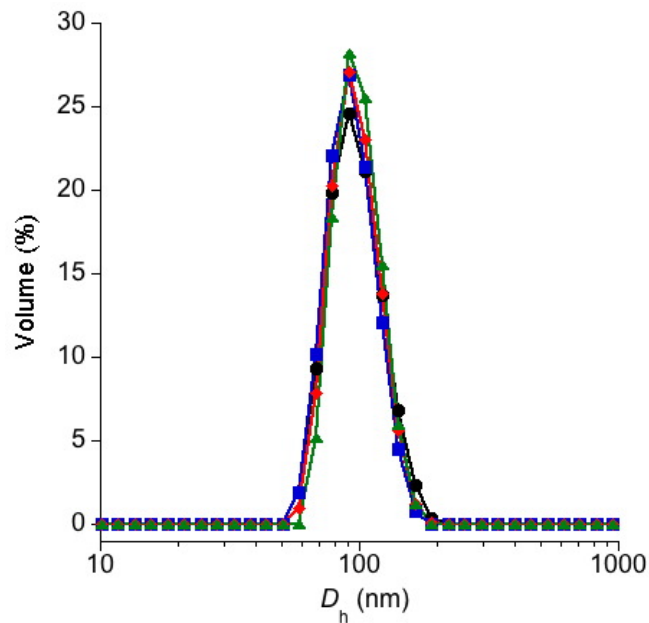

Figure S 33. Hydrodynamic diameter ( $D_h$ ) distribution (Volume (%)) of PNIPAAm<sub>72</sub>-PBNP<sub>73</sub> micelles at 25 °C (●), 35 °C (■), 40 °C (◆), and 50 °C (⊕). Run 3.

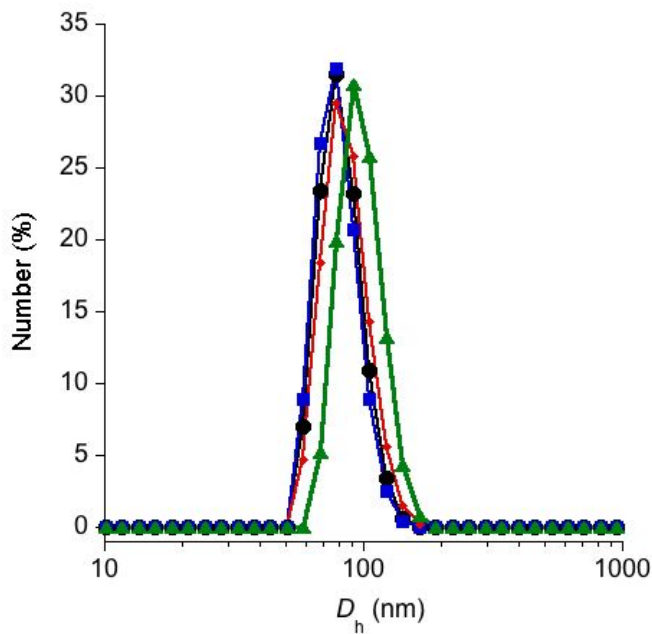

Figure S 34. Hydrodynamic diameter ( $D_h$ ) distribution (Number (%)) of PNIPAAm<sub>72</sub>-PMNP<sub>78</sub> micelles at 25 °C (●), 35 °C (■), 40 °C (◆), and 50 °C (⊕).

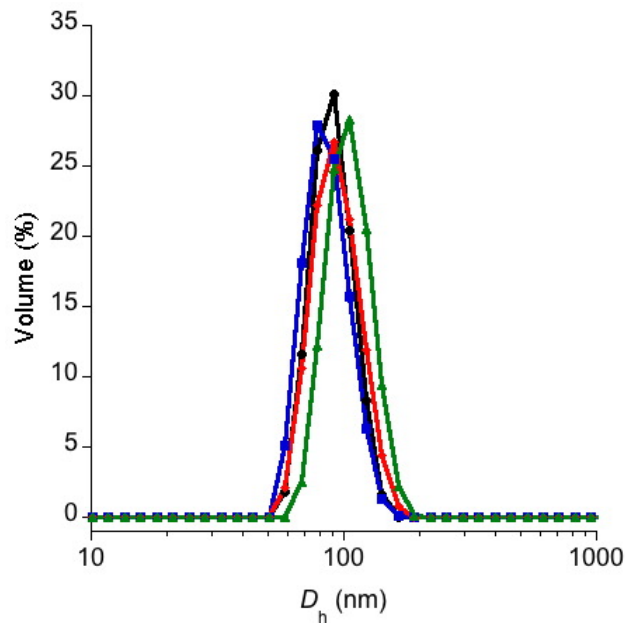

Figure S 35. Hydrodynamic diameter ( $D_h$ ) distribution (Volume (%)) of PNIPAAm<sub>72</sub>-PMNP<sub>78</sub> micelles at 25 °C (●), 35 °C (■), 40 °C (◆), and 50 °C (⊙). Run 1.

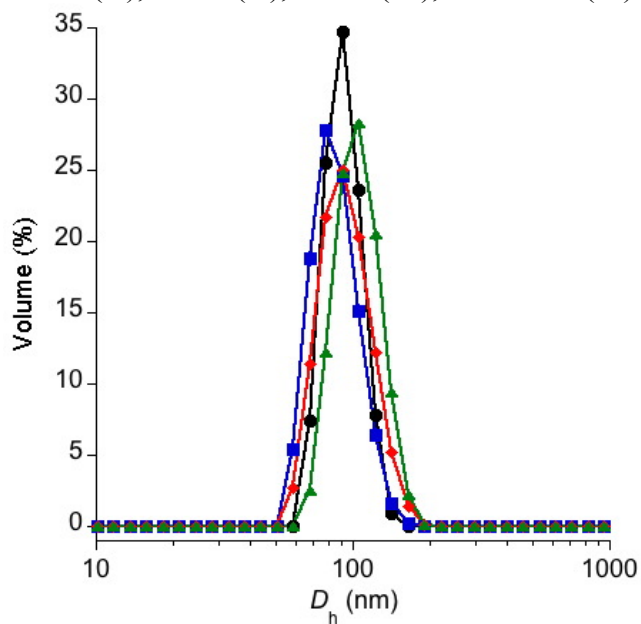

Figure S 36. Hydrodynamic diameter ( $D_h$ ) distribution (Volume (%)) of PNIPAAm<sub>72</sub>-PMNP<sub>78</sub> micelles at 25 °C (●), 35 °C (■), 40 °C (◆), and 50 °C (⊙). Run 2.

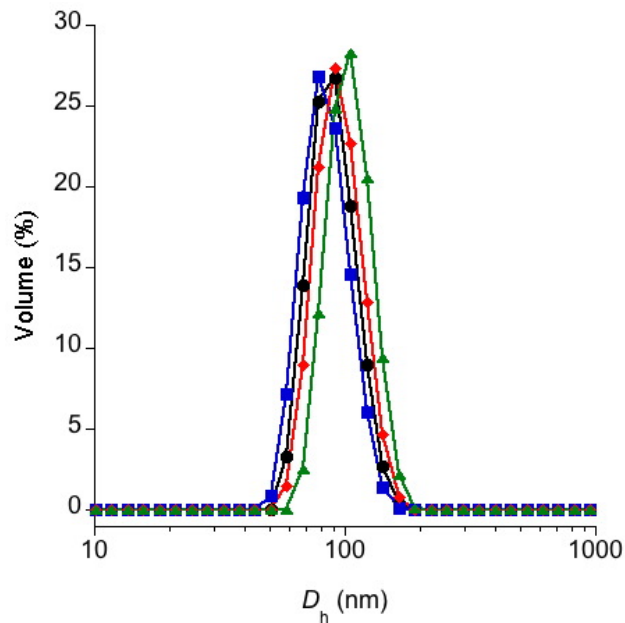

Figure S 37. Hydrodynamic diameter ( $D_h$ ) distribution (Volume (%)) of PNIPAAm<sub>72</sub>-PMNP<sub>78</sub> micelles at 25 °C (●), 35 °C (■), 40 °C (◆), and 50 °C (⊙). Run 3.

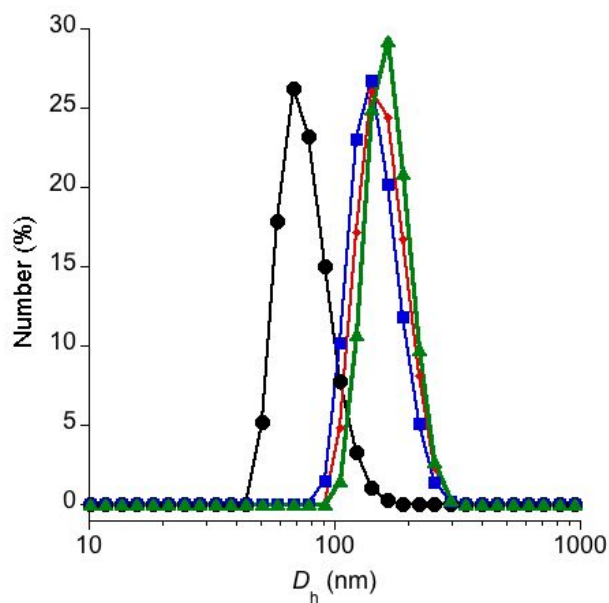

Figure S 38. Hydrodynamic diameter ( $D_h$ ) distribution (Number (%)) of PNIPAAm<sub>72</sub>-PNP<sub>79</sub> micelles at 25 °C (●), 35 °C (■), 40 °C (◆), and 50 °C (⊙).

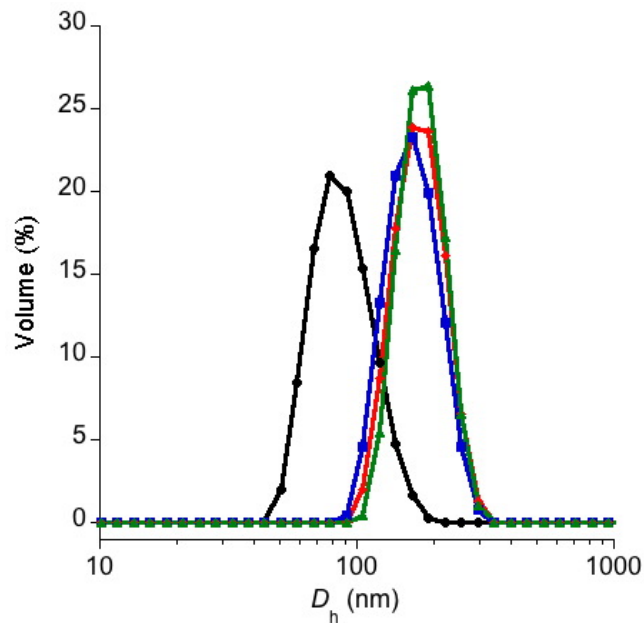

Figure S 39. Hydrodynamic diameter ( $D_h$ ) distribution (Volume (%)) of PNIPAAm<sub>72</sub>-PNP<sub>79</sub> micelles at 25 °C (●), 35 °C (■), 40 °C (◆), and 50 °C (⊖). Run 1.

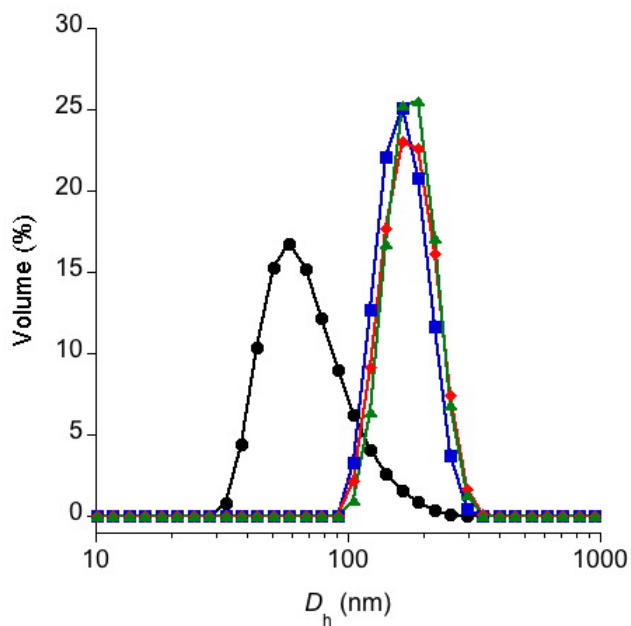

Figure S 40. Hydrodynamic diameter ( $D_h$ ) distribution (Volume (%)) of PNIPAAm<sub>72</sub>-PNP<sub>79</sub> micelles at 25 °C (●), 35 °C (■), 40 °C (◆), and 50 °C (⊖). Run 2.



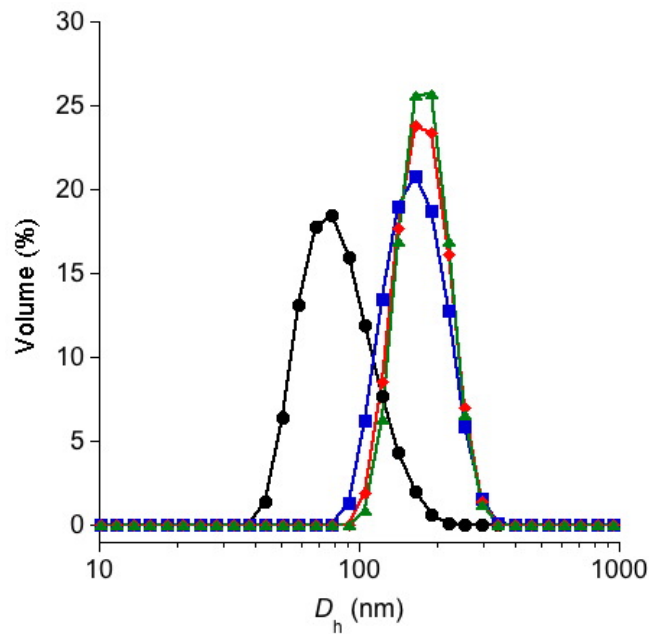

Figure S 41. Hydrodynamic diameter ( $D_h$ ) distribution (Volume (%)) of PNIPAAm<sub>72</sub>-PNP<sub>79</sub> micelles at 25 °C (●), 35 °C (■), 40 °C (◆), and 50 °C (⊙). Run 3.

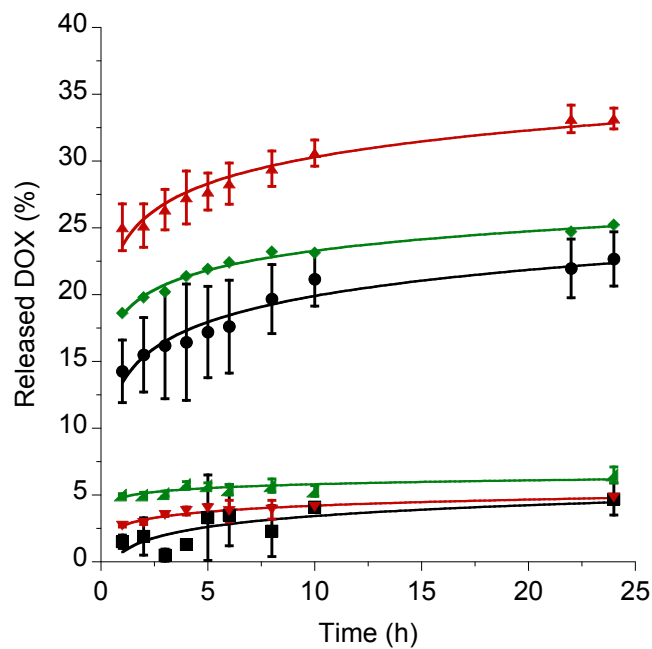

Figure S 42. DOX release from a) PNIPAAm<sub>72</sub>-PNP<sub>79</sub> at 37°C (⊙) and 20°C (⊚), PNIPAAm<sub>72</sub>-PMNP<sub>78</sub> at 37°C (◆) and 20°C (⊞), and PNIPAAm<sub>72</sub>-PBNP<sub>73</sub> 37°C (●) and 20°C (⊙). Data points are plotted as a mean with standard deviation (n = 3).

Table S1. LCST (°C) of block copolymers in deionized water.

| Polymer                                   | Run 1 | Run 2 | Run 3 |
|-------------------------------------------|-------|-------|-------|
| PNIPAAm <sub>72</sub> -PBNP <sub>73</sub> | 34.9  | 37.9  | 39.9  |
| PNIPAAm <sub>72</sub> -PBNP <sub>26</sub> | 41.9  | 40.9  | 40.9  |
| PNIPAAm <sub>72</sub> -PMNP <sub>78</sub> | 39.0  | 38.0  | 38.9  |
| PNIPAAm <sub>72</sub> -PMNP <sub>29</sub> | 37.9  | 37.0  | 39.9  |
| PNIPAAm <sub>72</sub> -PNP <sub>79</sub>  | 32.0  | 34.1  | 32.2  |
| PNIPAAm <sub>72</sub> -PNP <sub>29</sub>  | 32.9  | 32.9  | 31.9  |

Table S2. LCST (°C) of block copolymers in PBS solution.

| Polymer                                   | Run 1 | Run 2 | Run 3 | mean ± S.D. |
|-------------------------------------------|-------|-------|-------|-------------|
| PNIPAAm <sub>72</sub> -PBNP <sub>73</sub> | 34.0  | 33.0  | 34.0  | 33.6 ± 0.6  |
| PNIPAAm <sub>72</sub> -PBNP <sub>26</sub> | 31.9  | 32.9  | 32.1  | 32.3 ± 0.5  |
| PNIPAAm <sub>72</sub> -PMNP <sub>78</sub> | 33.1  | 33.2  | 32.1  | 32.8 ± 0.6  |
| PNIPAAm <sub>72</sub> -PMNP <sub>29</sub> | 33.1  | 33.0  | 33.1  | 33.1 ± 0.0  |
| PNIPAAm <sub>72</sub> -PNP <sub>79</sub>  | 25.0  | 28.1  | 26.3  | 26.5 ± 1.6  |
| PNIPAAm <sub>72</sub> -PNP <sub>29</sub>  | 28.0  | 28.1  | 28.0  | 28.0 ± 0.0  |

Table S3.  $D_h$  of micelles (Volume (%)) with PDI in parentheses.

| Polymer                                   | Run 1         | Run 2         | Run 3         | mean ± S.D. |
|-------------------------------------------|---------------|---------------|---------------|-------------|
| PNIPAAm <sub>72</sub> -PBNP <sub>73</sub> | 101.5 (0.019) | 101.5 (0.025) | 98.9 (0.050)  | 100.6 ± 1.5 |
| PNIPAAm <sub>72</sub> -PBNP <sub>26</sub> | 55.7 (0.027)  | 55.3 (0.043)  | 56.7 (0.034)  | 55.9 ± 0.7  |
| PNIPAAm <sub>72</sub> -PMNP <sub>78</sub> | 91.1 (0.041)  | 92.7 (0.002)  | 90.9 (0.038)  | 91.6 ± 1.0  |
| PNIPAAm <sub>72</sub> -PMNP <sub>29</sub> | 80.7 (0.098)  | 78.4 (0.074)  | 79.9 (0.068)  | 79.7 ± 1.2  |
| PNIPAAm <sub>72</sub> -PNP <sub>29</sub>  | 131.3 (0.125) | 138.2 (0.077) | 138.2 (0.057) | 135.9 ± 4.0 |
| PNIPAAm <sub>72</sub> -PNP <sub>79</sub>  | 90.4 (0.119)  | 73.2 (0.131)  | 85.8 (0.121)  | 83.1 ± 8.9  |

Table S4.  $D_h$  of drug-loaded micelles (Volume (%)) with PDI in parentheses.

| Polymer                                   | Run 1         | Run 2         | Run 3         | mean ± S.D. |
|-------------------------------------------|---------------|---------------|---------------|-------------|
| PNIPAAm <sub>72</sub> -PBNP <sub>73</sub> | 56.6 (0.253)  | 52.2 (0.256)  | 58.3 (0.252)  | 55.7 ± 3.1  |
| PNIPAAm <sub>72</sub> -PBNP <sub>26</sub> | 36.0 (0.172)  | 37.4 (0.156)  | 35.9 (0.159)  | 36.5 ± 0.8  |
| PNIPAAm <sub>72</sub> -PMNP <sub>78</sub> | 45.4 (0.240)  | 57.7 (0.236)  | 56.4 (0.265)  | 53.0 ± 6.6  |
| PNIPAAm <sub>72</sub> -PMNP <sub>29</sub> | 55.0 (0.199)  | 47.5 (0.201)  | 65.4 (0.191)  | 55.9 ± 9.0  |
| PNIPAAm <sub>72</sub> -PNP <sub>29</sub>  | 78.3 (0.243)  | 75.3 (0.226)  | 80.8 (0.108)  | 78.1 ± 2.8  |
| PNIPAAm <sub>72</sub> -PNP <sub>79</sub>  | 143.4 (0.141) | 141.2 (0.135) | 144.7 (0.145) | 143.1 ± 1.8 |
